# Supplementary material for: Optimized Zn2SnO4 nanoparticles with enhanced performance for photodetectors and photocatalysts
Source: Royal Society of Chemistry journal article supplement (doi:10.1039/c6ra13769e), 2016-01-01
Supplement: c6ra13769e1.pdf [file c6ra13769e1.pdf]

## Electronic Supplementary Information

### Optimized Zn<sub>2</sub>SnO<sub>4</sub> nanoparticles with enhanced performance of Photodetectors and Photocatalysts †

Yu-Fen Wang,<sup>ac</sup> Yang Ding,<sup>ac</sup> Xi-Fei Li,<sup>\*ac</sup> Xin Wang,<sup>ac</sup> De-Jun Li<sup>ac</sup> and Jin-Sheng Zhao<sup>\*b</sup>

<sup>a</sup>Energy & Materials Engineering Centre, College of Physics and Materials Science, Tianjin Normal University, Tianjin 300387, China. E-mail: [xfli@mail.tjnu.edu.cn](mailto:xfli@mail.tjnu.edu.cn)

<sup>b</sup> Shandong Key Laboratory of Chemical Energy Storage and Novel Cell Technology, Liaocheng University, Liaocheng, 252059, P. R. China. E-mail: [j.s.zhao@163.com](mailto:j.s.zhao@163.com)

<sup>c</sup>Tianjin International Joint Research Centre of Surface Technology for Energy Storage Materials, Tianjin 300387, China.

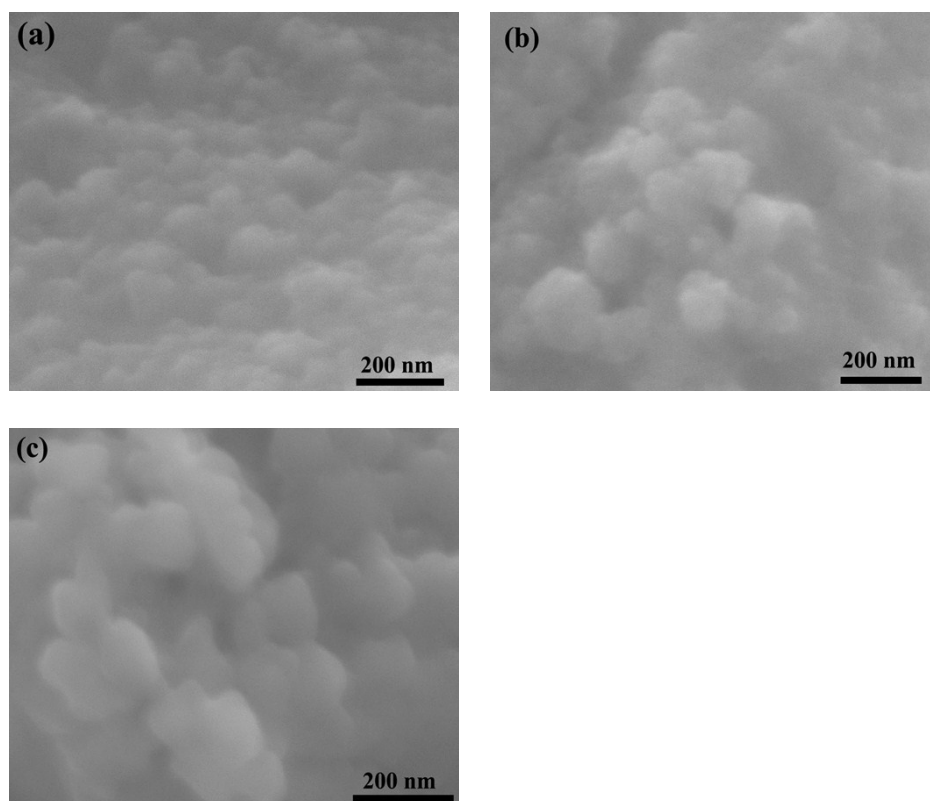

**Fig. S1.** FE-SEM images of Zn<sub>2</sub>SnO<sub>4</sub> nanoparticles with different sizes.

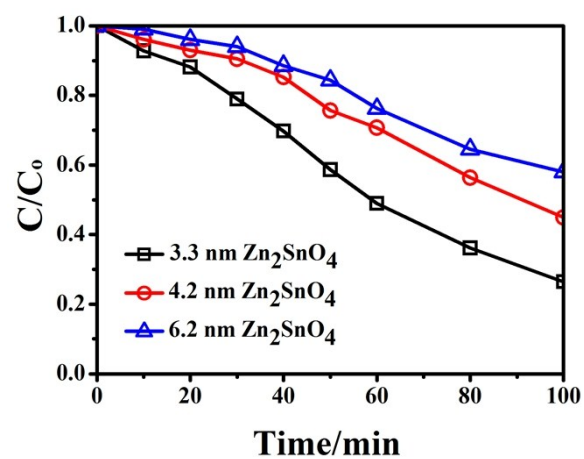

**Fig. S2** Photocatalytic activities of  $Zn_2SnO_4$  nanoparticles with different sizes for photodegradation of RhB molecules.
